# Supplementary material for: Measuring the Outcomes of Maternal COVID-19-related Prenatal Exposure (MOM-COPE): study protocol for a multicentric longitudinal project
Source: PubMed Central journal article supplement — BMJ Open. 2020 Dec 31;10(12):e044585. doi: 10.1136/bmjopen-2020-044585 (PMC7780424; doi:10.1136/bmjopen-2020-044585), 2020-12-31
Supplement: bmjopen-2020-044585supp001.pdf [file bmjopen-2020-044585supp001.pdf]

## Maternal COVID-19-related Prenatal Stress (MCPS)

### Physical exposure (MCPS<sub>PE</sub>)

| <i>During pregnancy</i>                                                                  | YES | NO |
|------------------------------------------------------------------------------------------|-----|----|
| 1. I was positive to the Covid-19                                                        |     |    |
| 2. I had symptoms that made me think I was positive to the Covid-19                      |     |    |
| 3. I had contacts with relatives or friends who were positive to the Covid-19            |     |    |
| 4. I live in a high contagion zone (red zone)                                            |     |    |
| 5. I had contacts with relatives or friends who live in a high contagion zone (red zone) |     |    |
| 6. One of my relatives or friends was hospitalized due to Covid-19 infection             |     |    |
| 7. One of my relatives or friends died with Covid-19                                     |     |    |

### Emotional elaboration (MCPS<sub>EE</sub>)

| <i>During pregnancy</i>                                               | Not at all | Not much | Moderately | Very much | Extremely |
|-----------------------------------------------------------------------|------------|----------|------------|-----------|-----------|
| 1. How much worried were you about the risk of infection by Covid-19? |            |          |            |           |           |
| 2. How much did you feel that your pregnancy was at risk?             |            |          |            |           |           |
| 3. How much did you fear for your health?                             |            |          |            |           |           |
| 4. How much did you fear for your baby's health?                      |            |          |            |           |           |
| 5. How much did you feel that you had lost confidence in your health? |            |          |            |           |           |
| 6. How much did you feel you had lost faith in your physician?        |            |          |            |           |           |

### Cognitive elaboration (MCPS<sub>CE</sub>)

| <i>During pregnancy</i>                                            | Never | Rarely | Sometimes | Often | Always |
|--------------------------------------------------------------------|-------|--------|-----------|-------|--------|
| 1. I looked for information about the virus on the web             |       |        |           |       |        |
| 2. I found out about the virus on television                       |       |        |           |       |        |
| 3. I looked for information through scientific journals or experts |       |        |           |       |        |
| 4. I decided I didn't want to know anything about it               |       |        |           |       |        |
| 5. I requested (or I thought to request) a psychological support   |       |        |           |       |        |
| 6. I told myself that the virus wasn't dangerous                   |       |        |           |       |        |
| 7. I told myself that the virus was dangerous                      |       |        |           |       |        |
| 8. I tried to understand who was to blame for the emergency        |       |        |           |       |        |
| 9. I accepted that the real situation of emergency                 |       |        |           |       |        |

**Lifestyle (MCPS<sub>LS</sub>)**

| <i>During pregnancy</i>                                           | YES | NO |
|-------------------------------------------------------------------|-----|----|
| 1. Did you change your lifestyle?                                 |     |    |
| 2. Did you reduce your social contacts?                           |     |    |
| 3. Did you go out less frequently?                                |     |    |
| 4. Did you reduce your contacts with relatives and close friends? |     |    |
| 5. Did you change the way you took care of your health?           |     |    |
| 6. Has the father of your baby reduced or stopped working?        |     |    |
